# Supplementary material for: Cyclin D1 is Associated with Radiosensitivity of Triple-Negative Breast Cancer Cells to Proton Beam Irradiation
Source: MDPI journal article supplement (doi:10.3390/ijms20194943), 2019-10-07
Supplement: s1 [file s1]

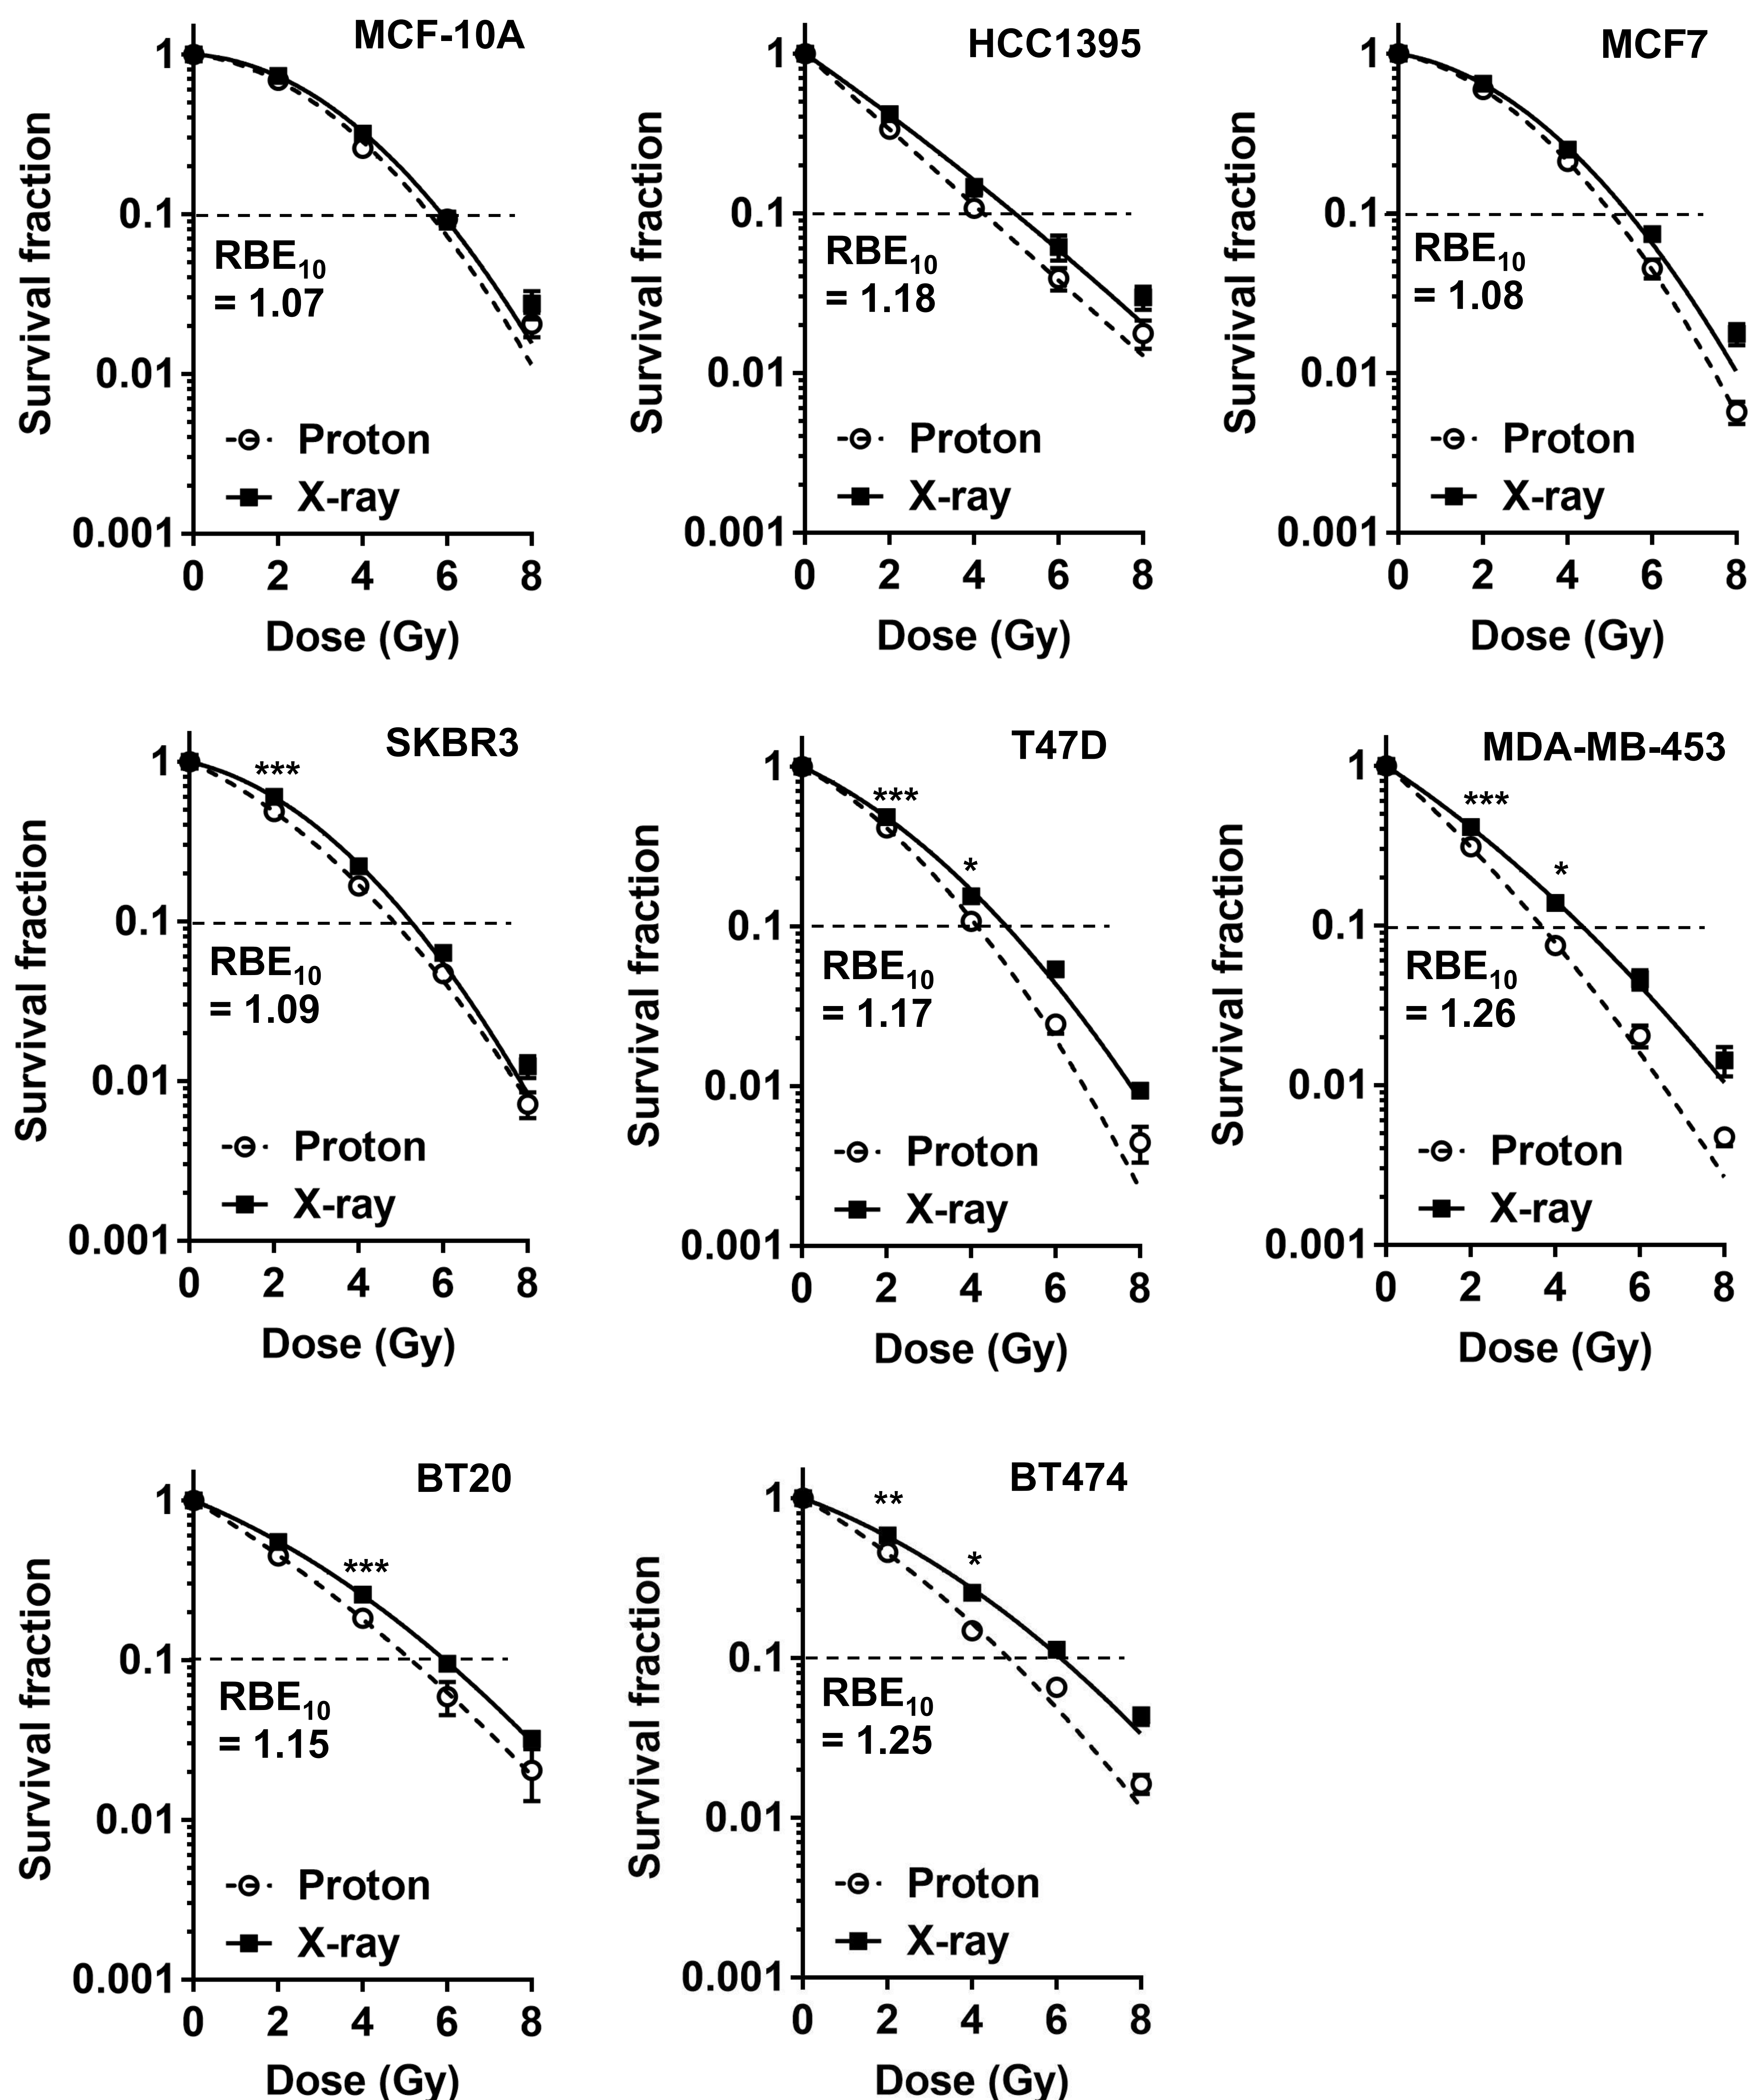

**Figure S1.** Clonogenic survival curves of eight human breast cancer cell lines against X-ray and proton irradiation. Data are presented as the mean  $\pm$  SEM of three independent experiments. Curves were fitted with linear quadratic model. The differences are evaluated by a two-way ANOVA; \* $p < 0.05$ ; \*\*\*  $p < 0.001$ . Dashed lines indicate SF = 0.1.

**A**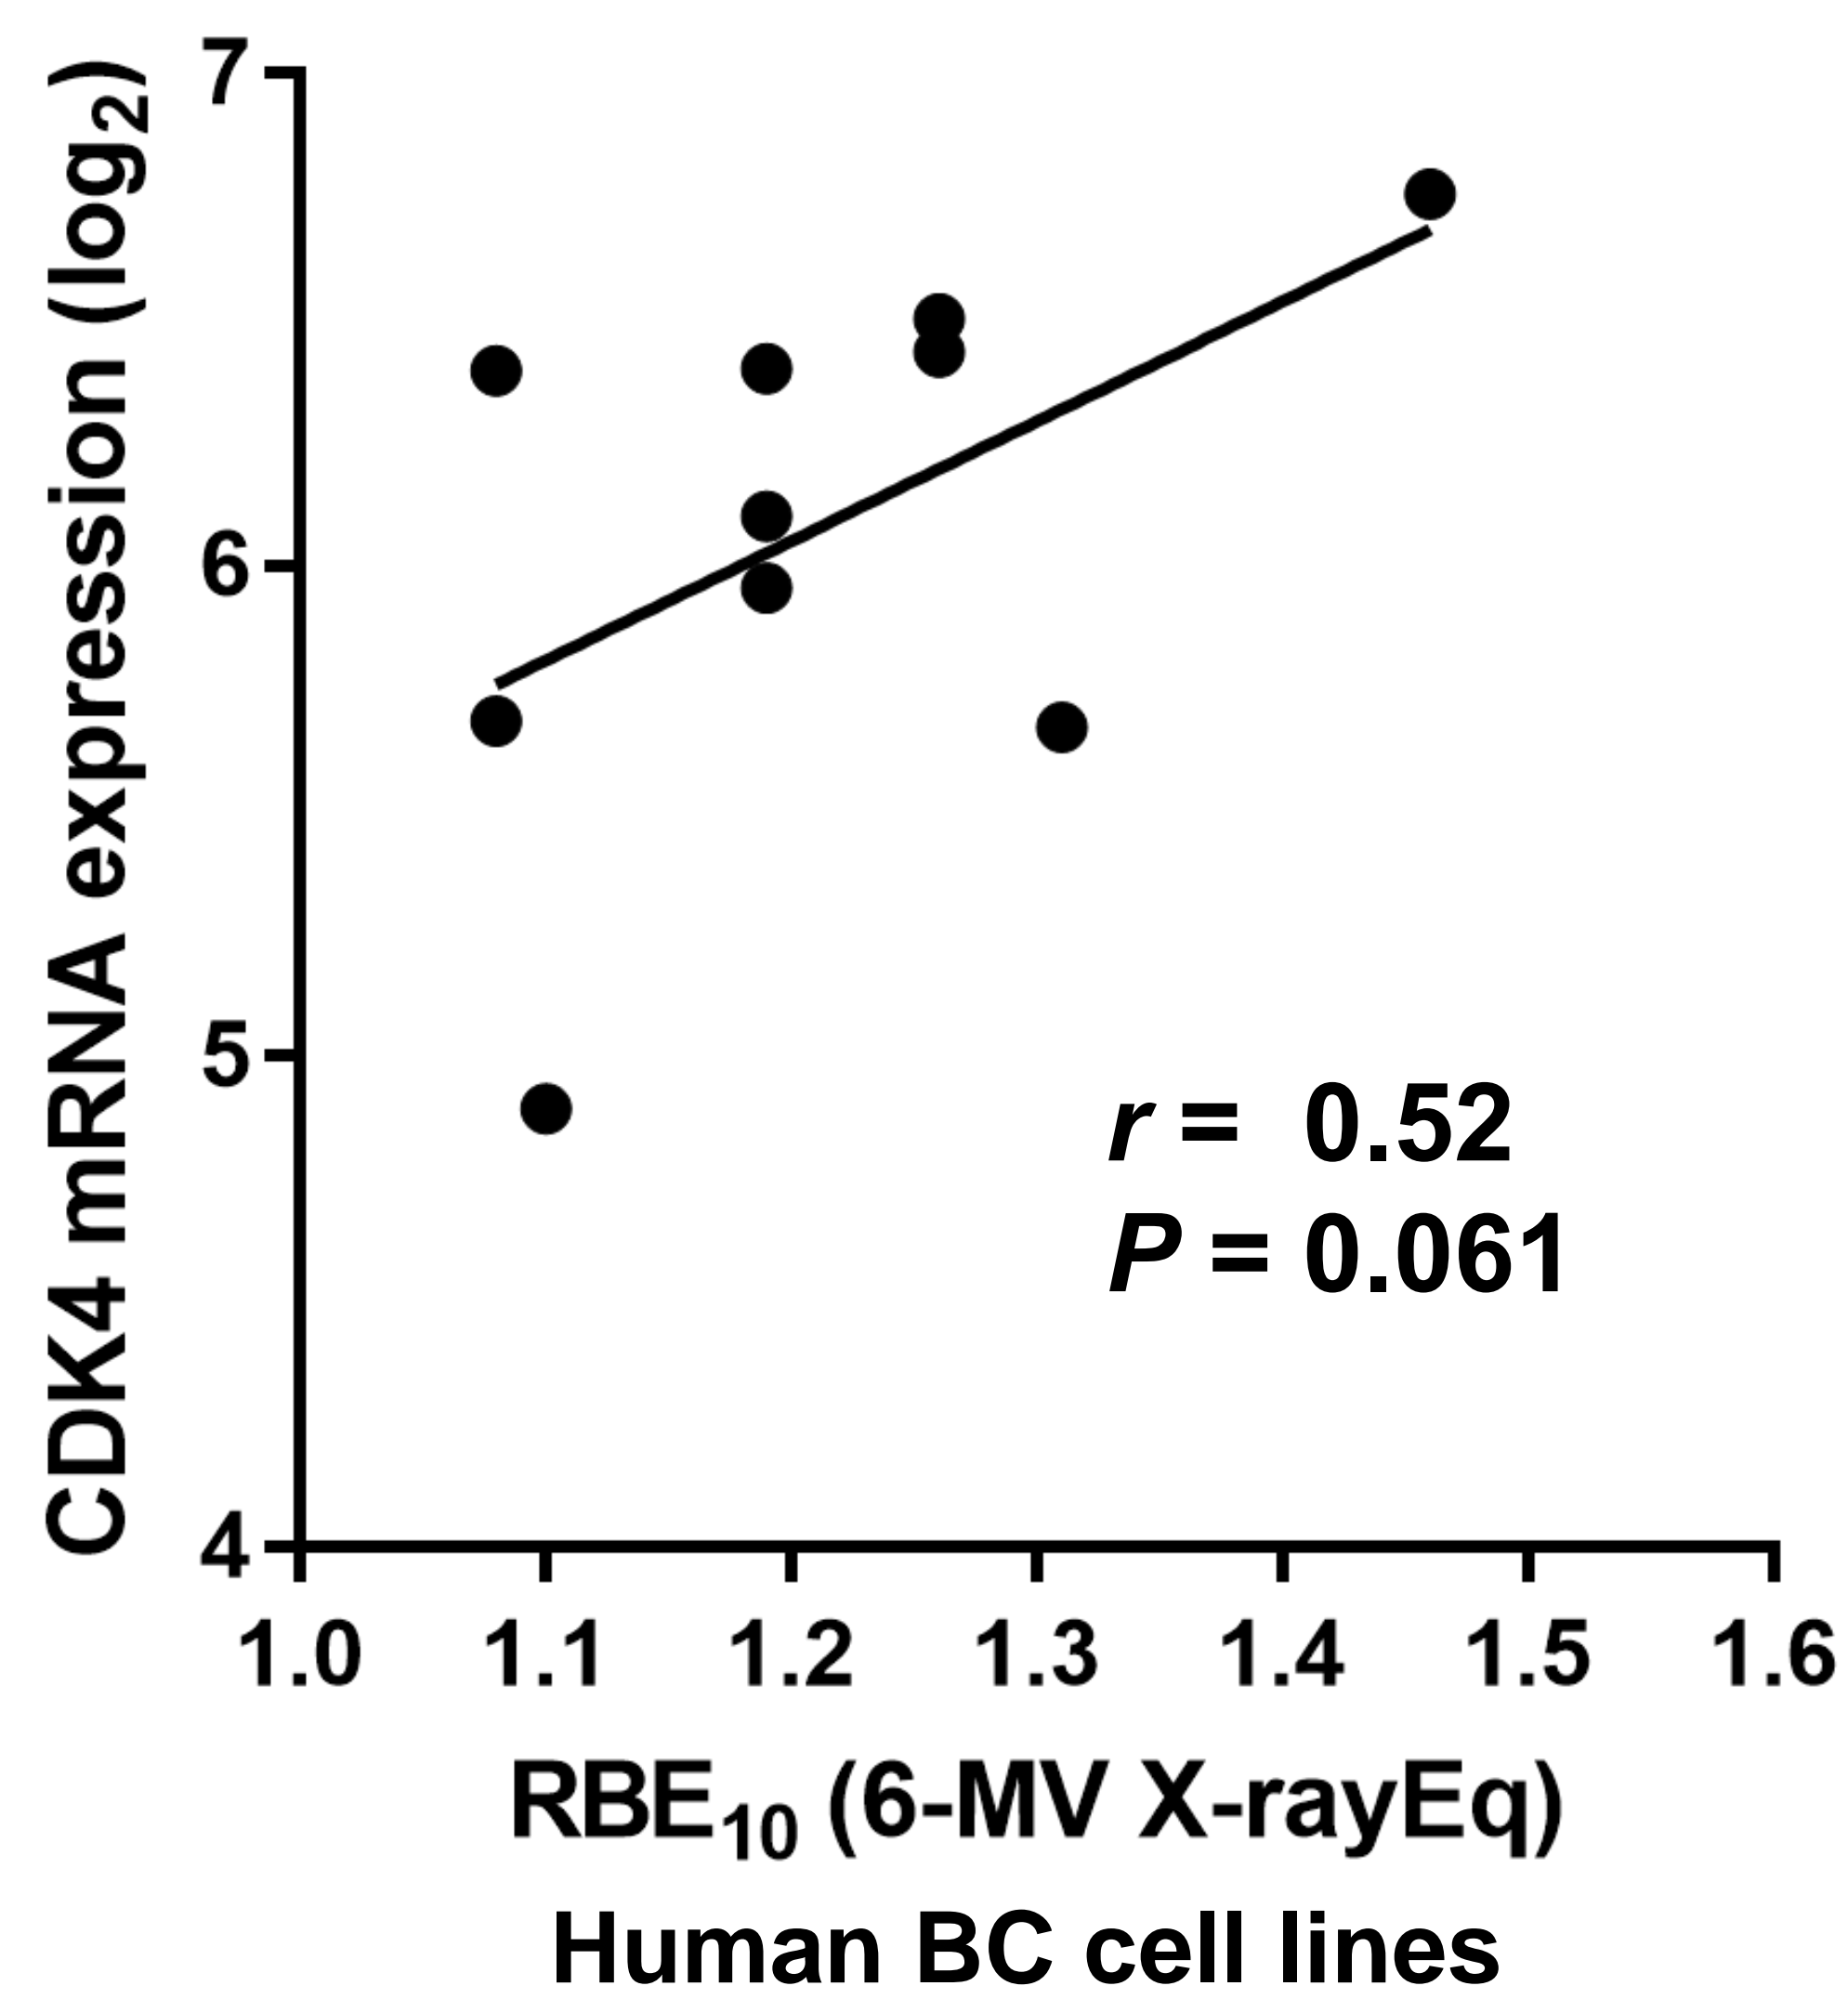**B**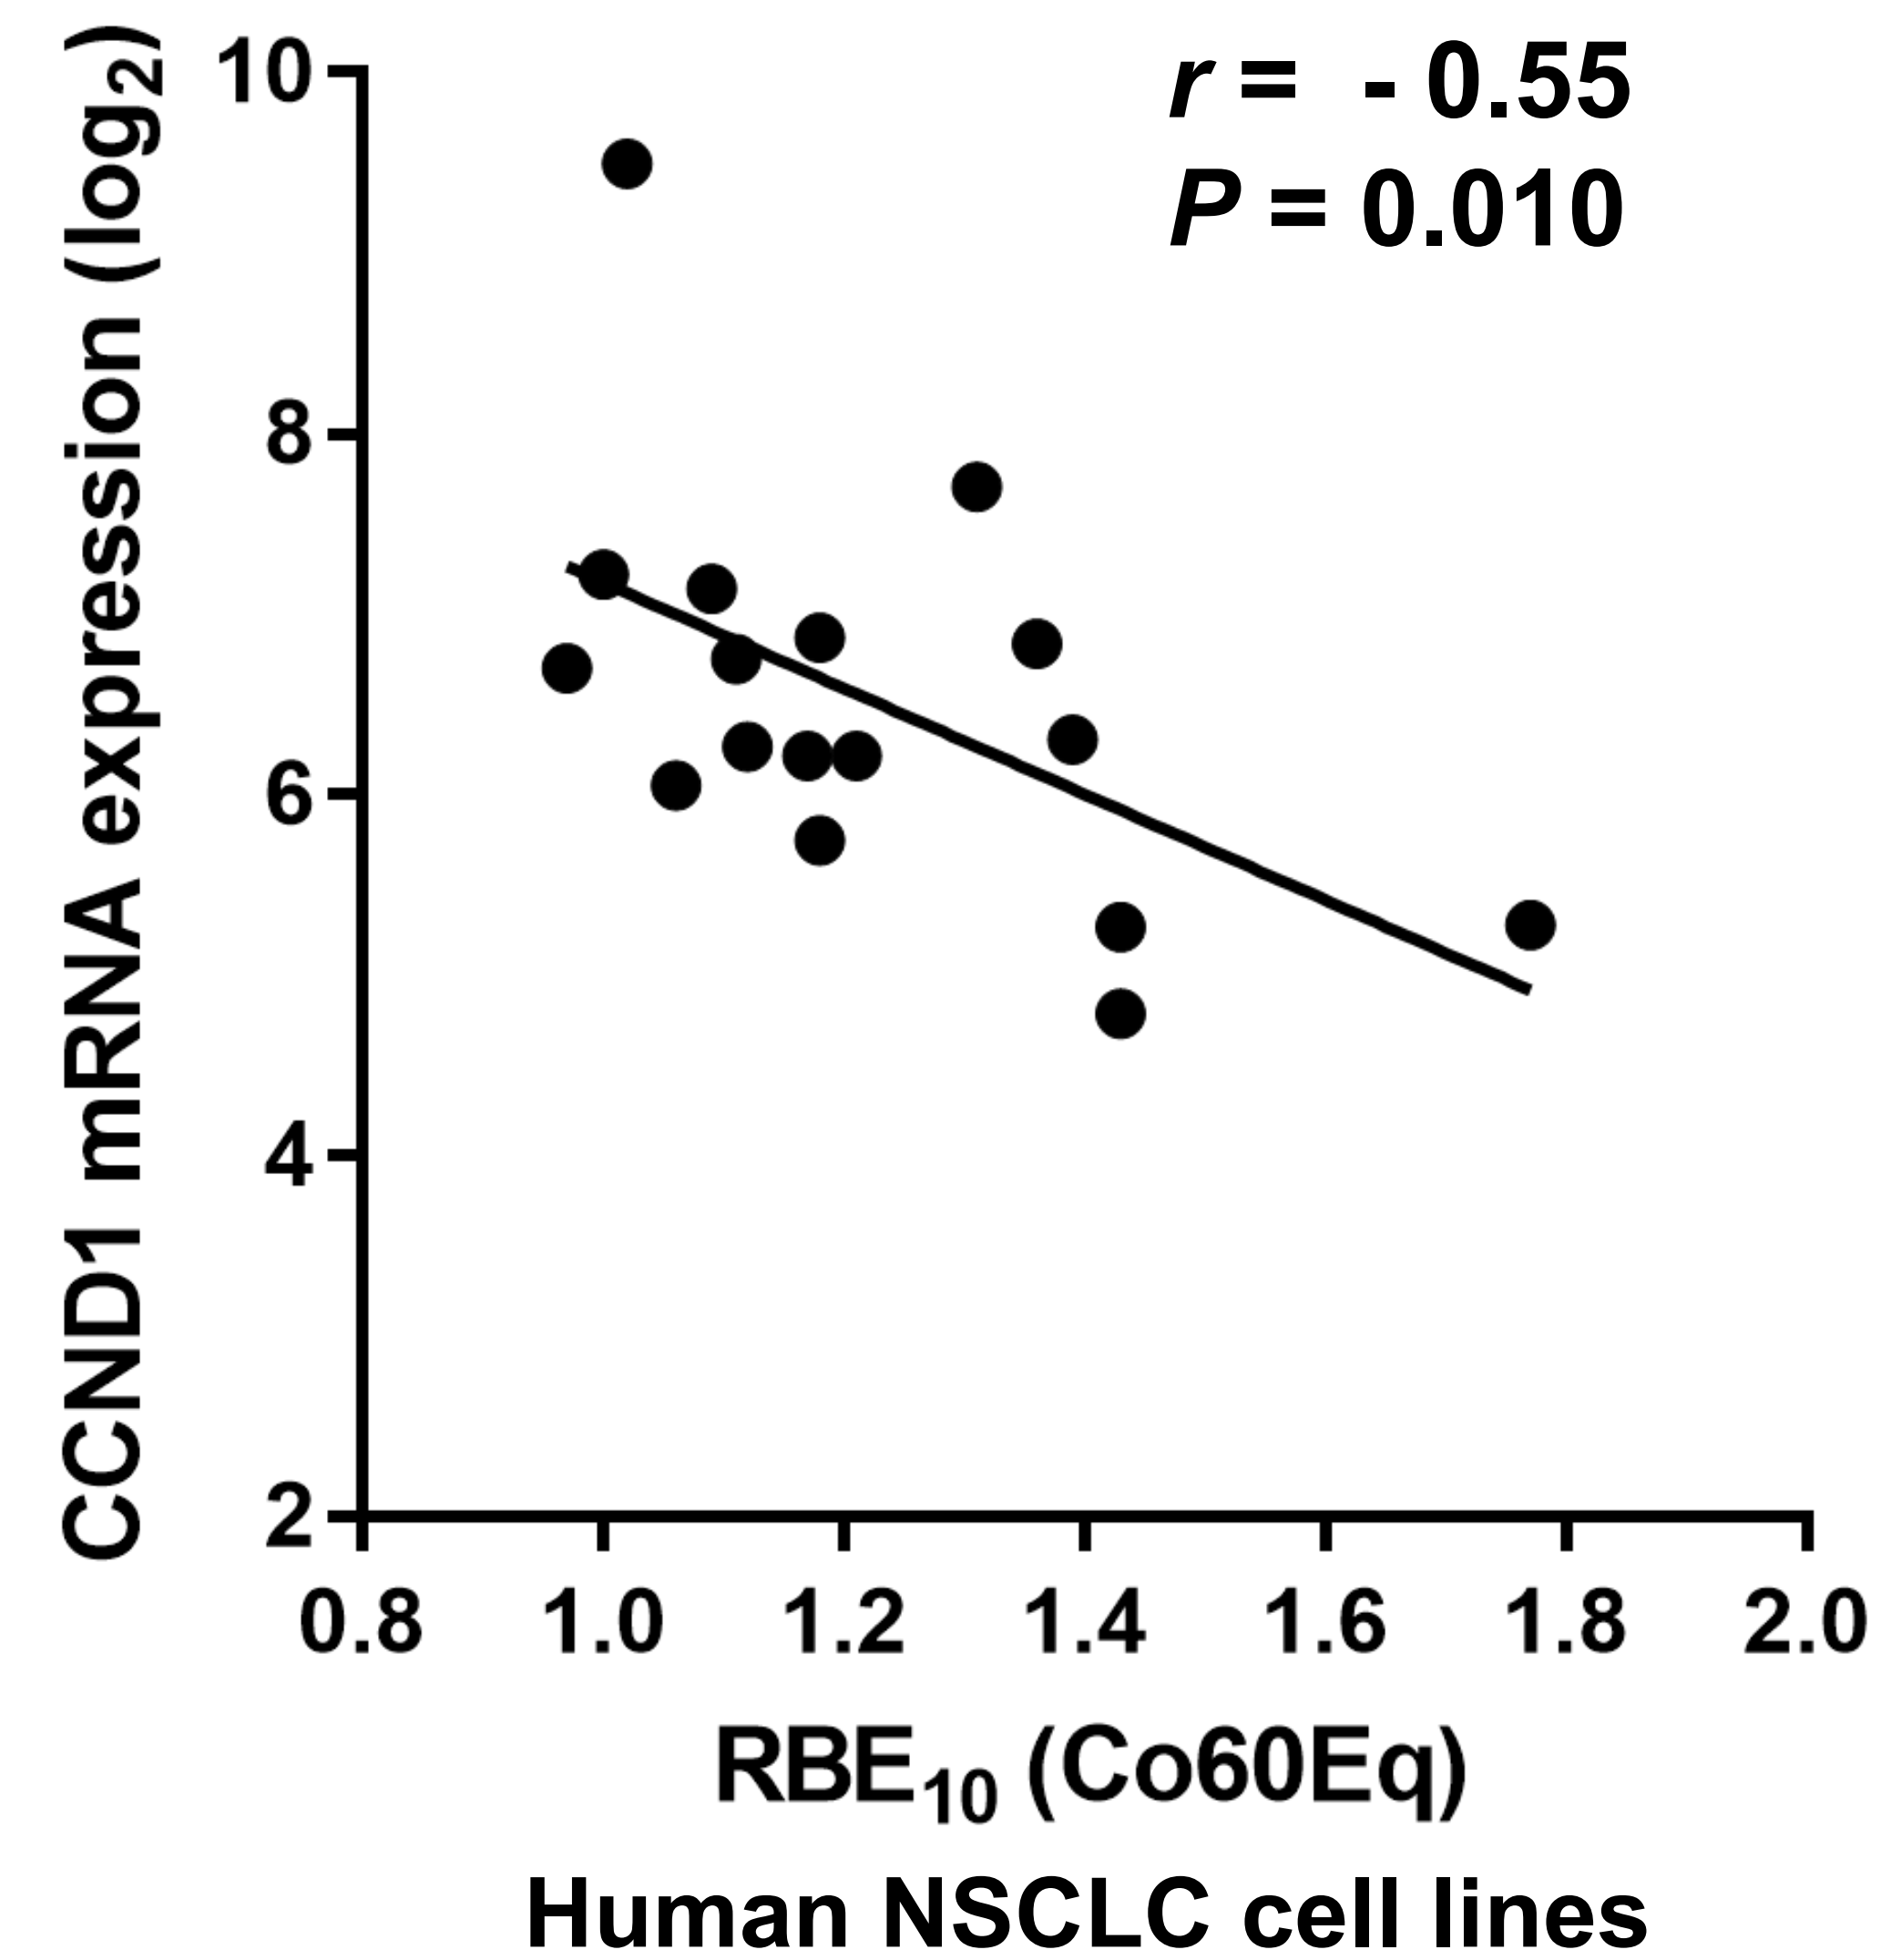

**Figure S2.** Scatter plot for correlation between RBE10 values and CDK4 mRNA expression in human BC cell lines (**A**) and cyclin D1 mRNA expression in human NSCLC cell lines (**B**). Log2 transformed RMA values were obtained from CCLE database. Pearson correlation coefficient ( $r$ ) between gene expression and proton RBE10 across all samples were presented.
